# Supplementary figures and images for: ATRX interacts with H3.3 in maintaining telomere structural integrity in pluripotent embryonic stem cells
Source: HighWire-hosted journal article supplement (doi:10.1101/gr.101477.109), 2010-01-28

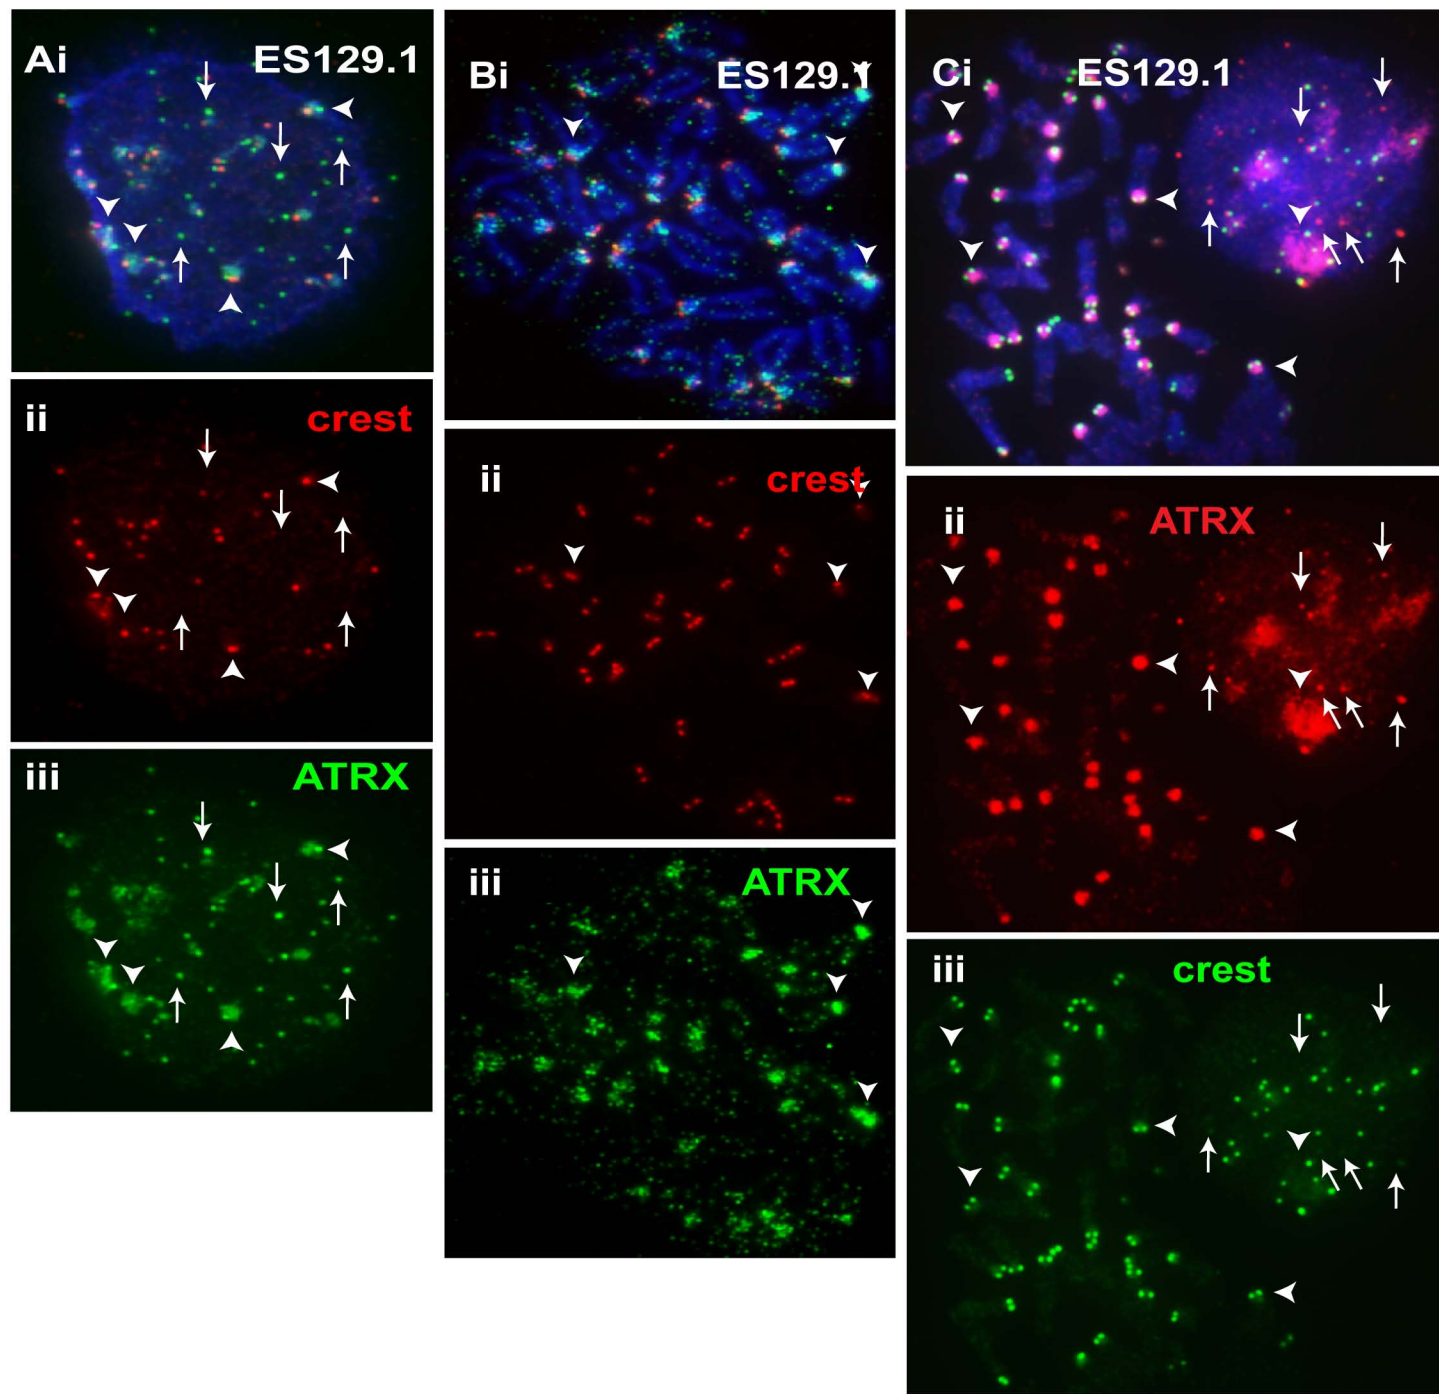

Supplemental Fig S1

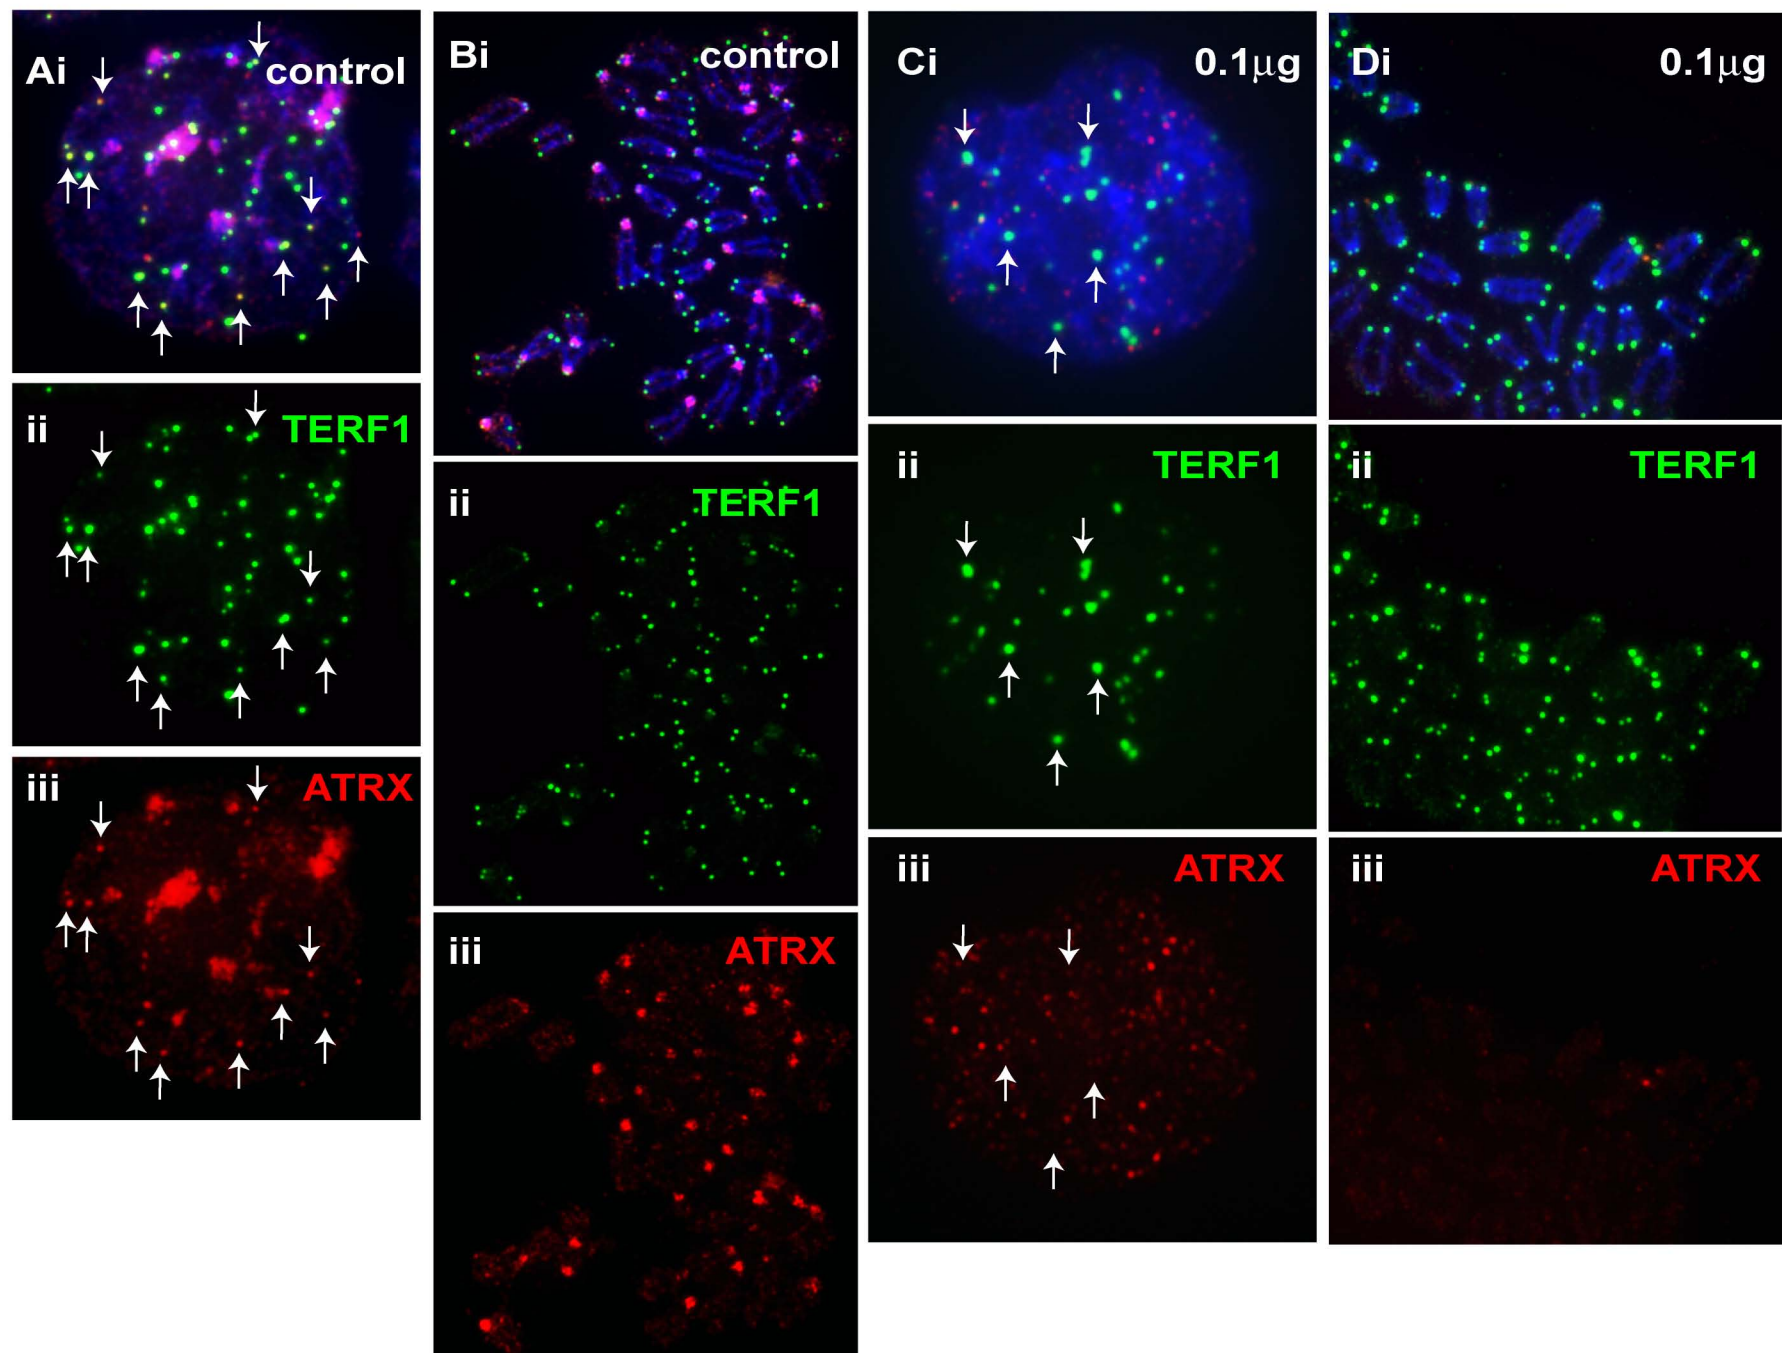

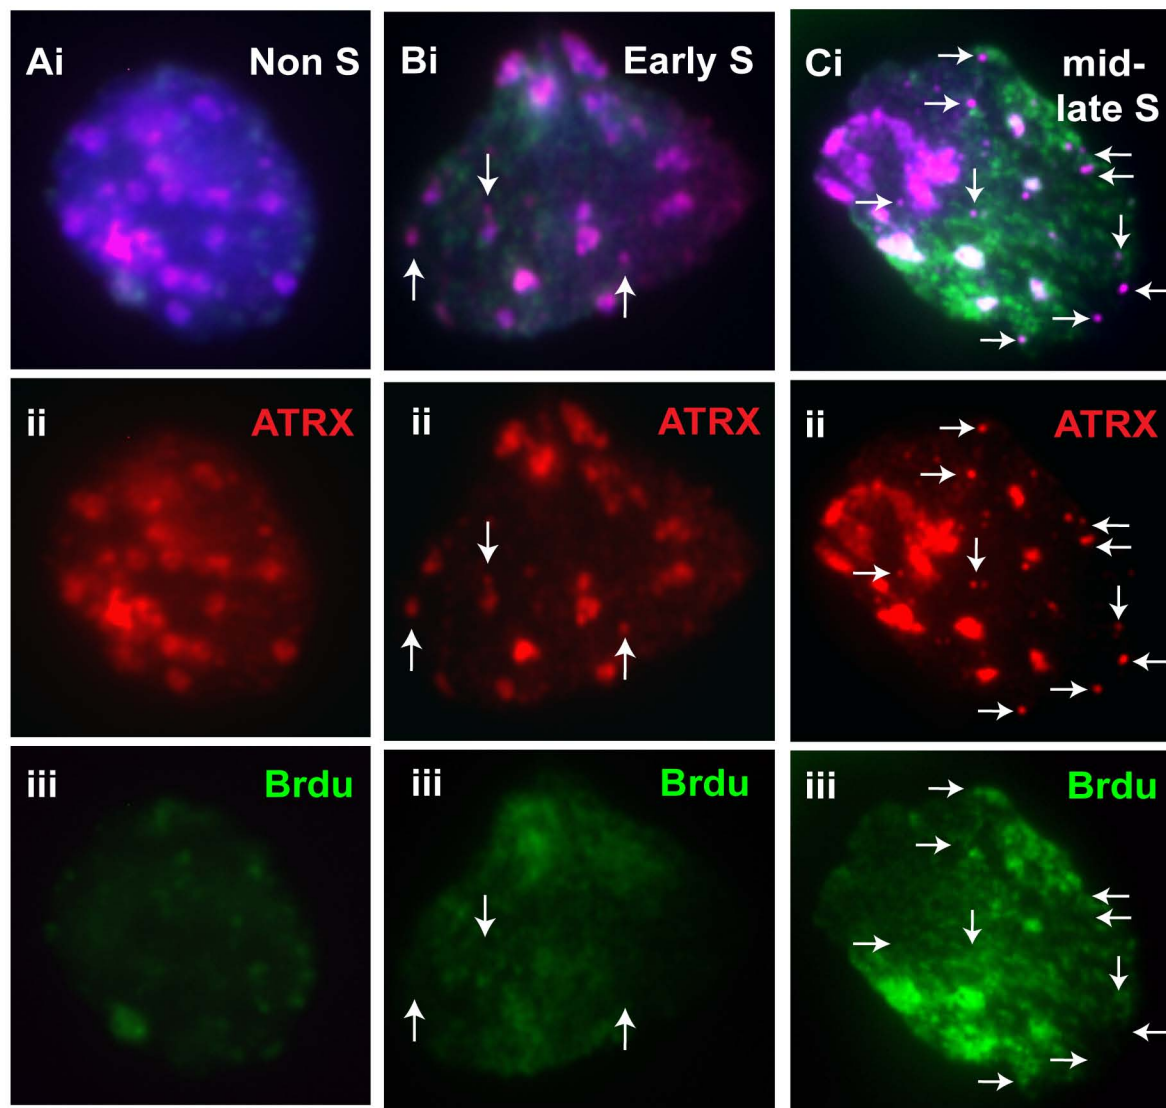

**D**

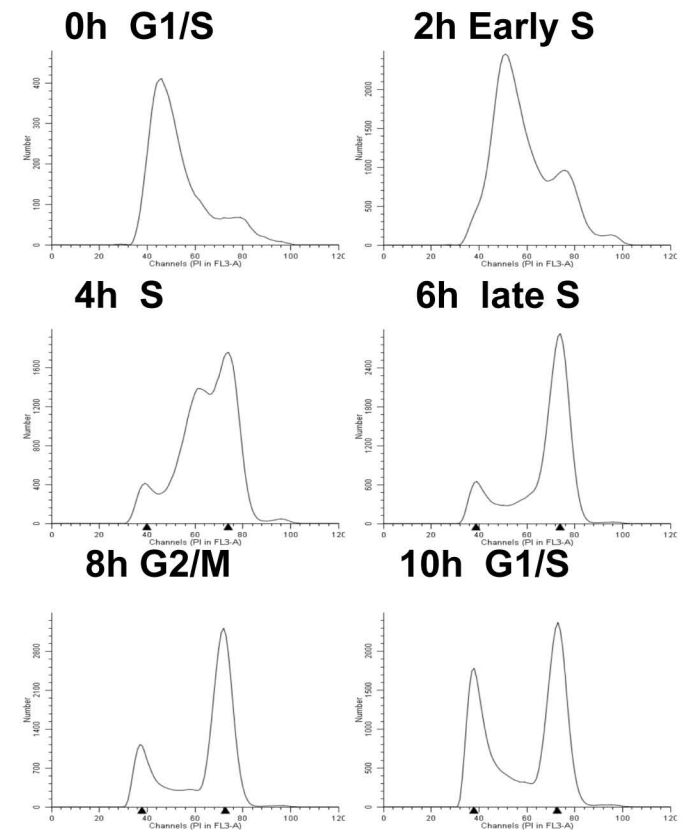

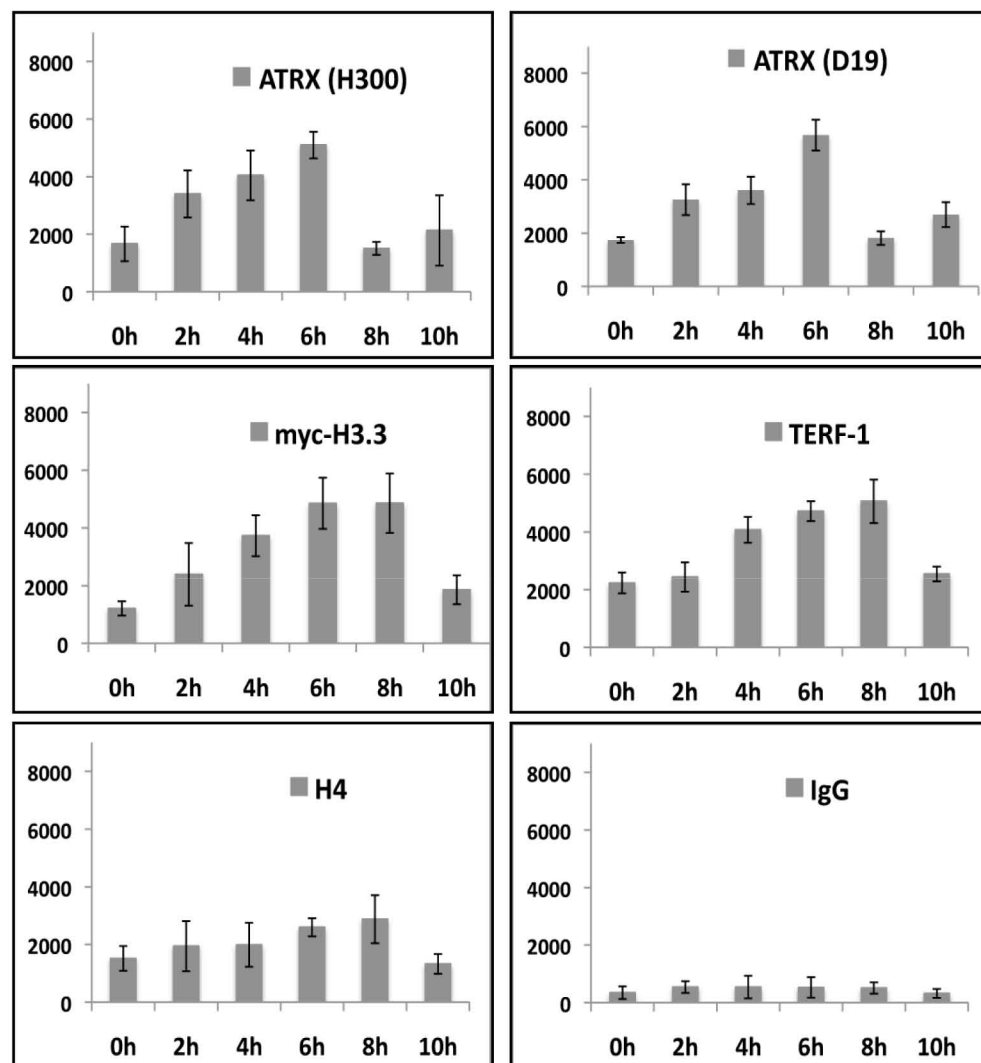

**Supplemental Fig S4**



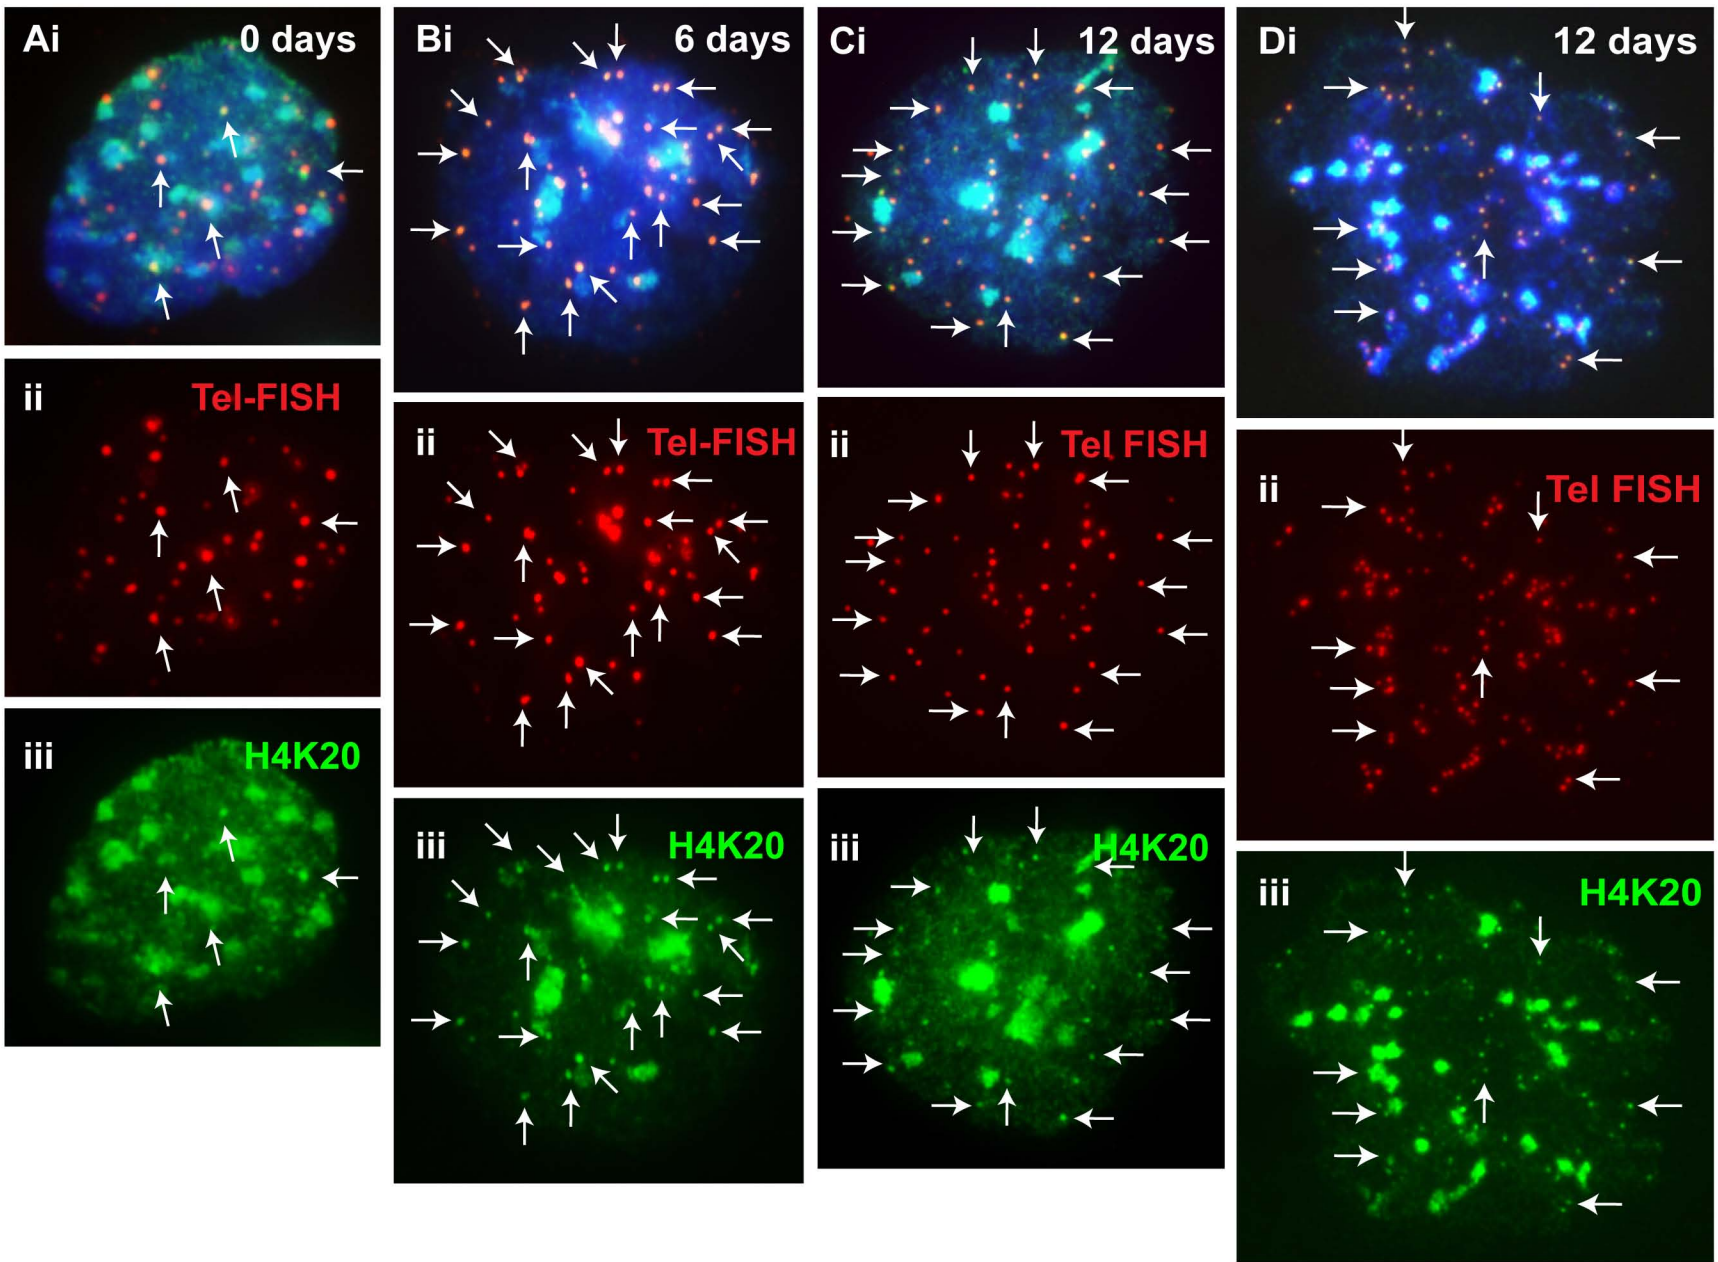

Supplemental Fig. S5

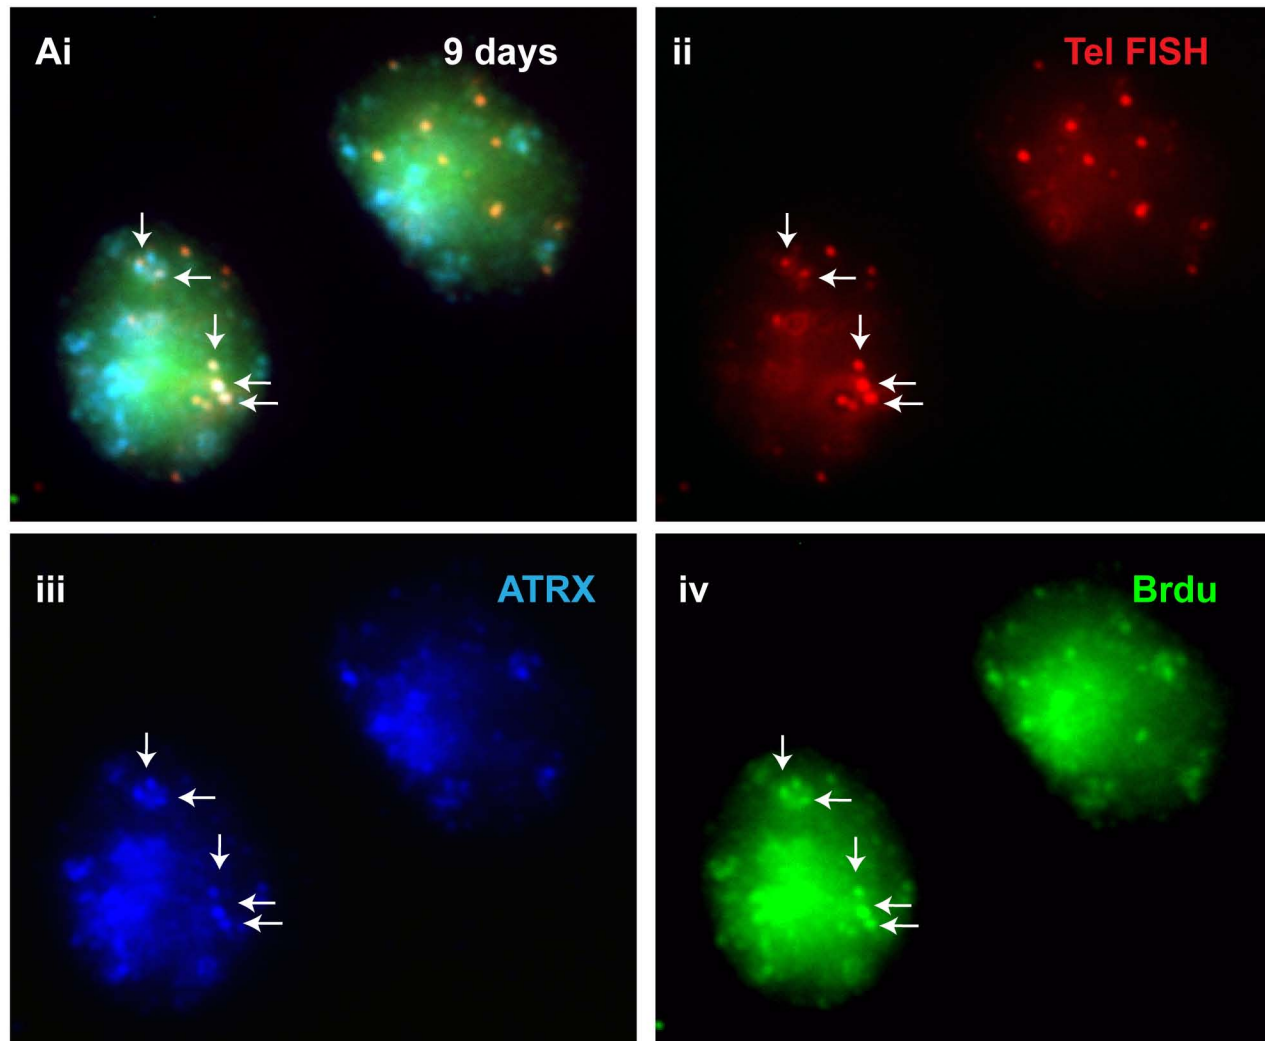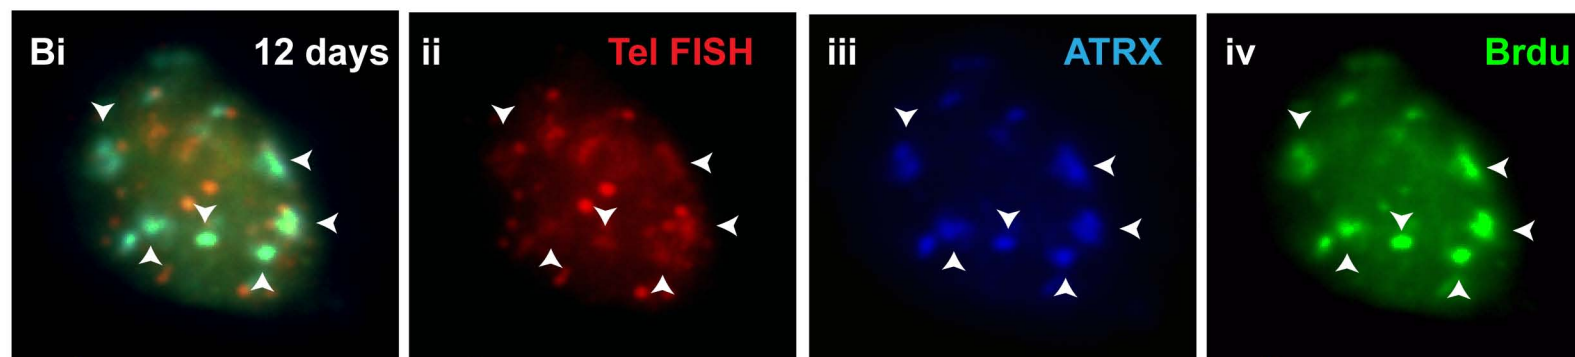

Supplemental Fig S6

**Ai**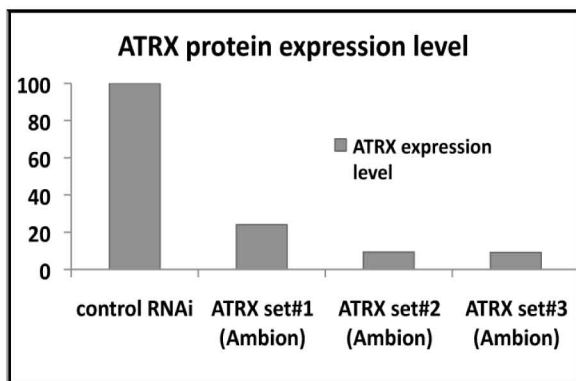**ii**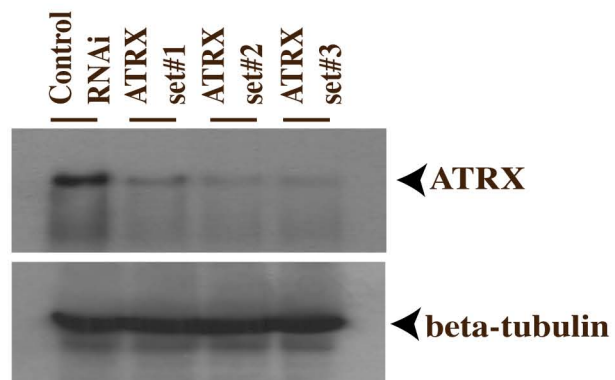**B**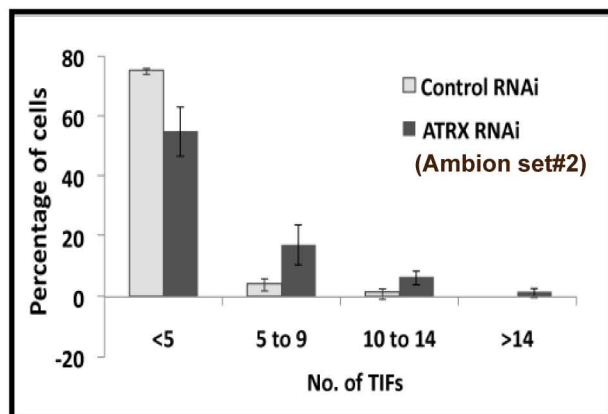**C**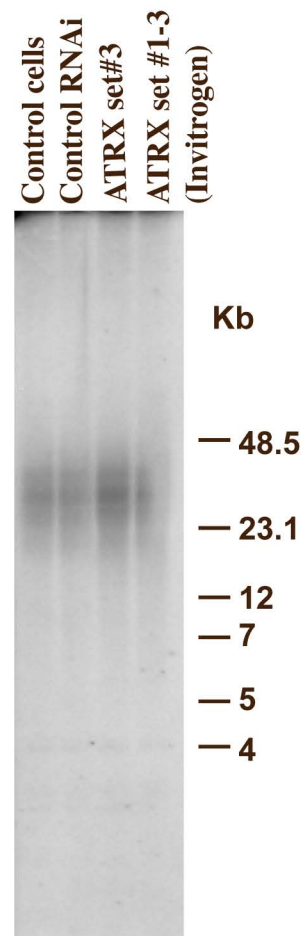

Supplement: Binder1.pdf [file Binder1.pdf]
